# Supplementary material
Source: Springer Nature journal article supplement (https://www.springermedizin.de/resource/supplementary/13046_2010_355_MOESM3_ESM.pdf/9661840)

0h

12h

24h

Control

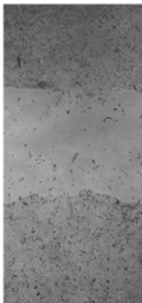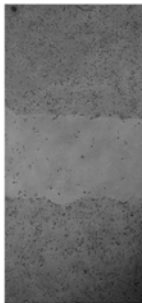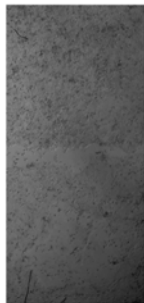

PTL  
(7.5 $\mu$ M)

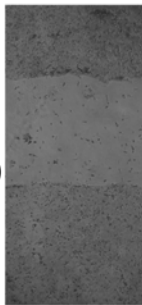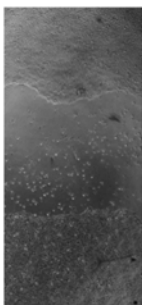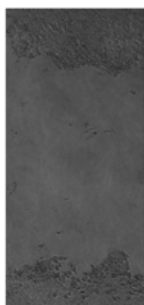

Supplement: MOESM3 [file 9661840]
